# Supplementary material for: A Rapid Method for Sequencing Double-Stranded RNAs Purified from Yeasts and the Identification of a Potent K1 Killer Toxin Isolated from Saccharomyces cerevisiae
Source: MDPI journal article supplement (doi:10.3390/v11010070), 2019-01-16
Supplement: s1 [file s1]

### Supplementary file 3

Raw gel images:

**Figure 1. The extraction of dsRNAs from dried and actively growing cultures of killer and non-killer *Saccharomyces* yeasts.**

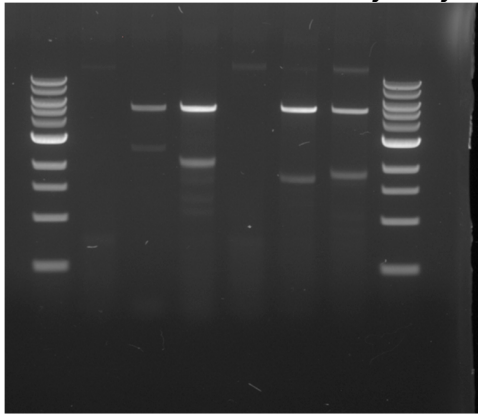

Lane 1 - Molecular weight marker (1kb ladder – New England Biolabs)

Lane 2 – CBS12357

Lane 3 – Y8.5

Lane 4 – BJH001

Lane 5 – BE-256

Lane 6 – EC-1118

Lane 7 – Montrachet

Lane 8 - Molecular weight marker (1kb ladder – New England Biolabs)

**Figure 3B (inset). Next-generation sequencing of totiviruses and dsRNA satellites from *S. cerevisiae* strain BJH001.**

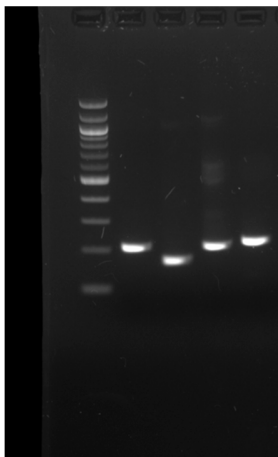

Lane 1 - Molecular weight marker (1kb ladder – New England Biolabs)

Lane 2 – RT-PCR amplification of ScV-M1

Lane 3 – RT-PCR amplification of ScV-L-BC  
Lane 4 – RT-PCR amplification of ScV-L-BC  
Lane 5 – RT-PCR amplification of ScV-L-A1

**Figure S1. Comparing methods for dsRNA extraction from *Saccharomyces* yeasts.**

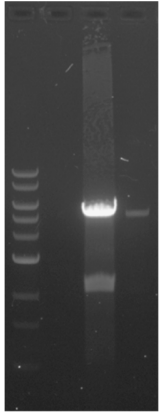

Lane 1 - Molecular weight marker (1kb ladder – New England Biolabs)  
Lane 2 – No sample  
Lane 3 - Bioopure MP and silica spin column extraction method  
Lane 4 - Acid phenol and cellulose powder extraction method
